# Supplementary material for: Joule-Heating Effect of Thin Films with Carbon-Based Nanomaterials
Source: MDPI journal article supplement (doi:10.3390/ma15124323), 2022-06-18
Supplement: s1 [file s1]

# Joule Heating Effect of Thin Films with Carbon-Based Nanomaterials

Usha Kiran Sanivada <sup>1,2,3\*</sup>, Dina Esteves <sup>1,3</sup>, Luisa M. Arruda <sup>1,3</sup>, Carla Silva <sup>4</sup>, Inês P. Moreira <sup>1,3</sup> and Raul Fangueiro <sup>1,3</sup>

<sup>1</sup> Fibrenamics – Institute of Innovation in Fiber-Based Materials and Composites, Azurém Campus, 4800-058, Guimarães, Portugal

<sup>2</sup> Mechanical Engineering and Resources Sustainability Centre (MEtRICS), University of Minho, Azurém Campus, 4800-058, Guimarães, Portugal

<sup>3</sup> Centre for Textile Science and Technology (2C2T), University of Minho, Azurém Campus, 4800-058, Guimarães, Portugal

<sup>4</sup> Simoldes Plastics, Research & Innovation, Rua Comendador António da Silva Rodrigues 165, Oliveira de Azeméis, Portugal

\* Correspondence: ushakiran.sanivada@gmail.com (U.K.S); rfangueiro@dem.uminho.pt (R.F.)

Table S1. Technical data of the materials

| Material        | Technical Specifications                                              | Supplier Details                    |
|-----------------|-----------------------------------------------------------------------|-------------------------------------|
| Edolan CM       | Aqueous aliphatic polycarbonate polyether polyurethane dispersion     | Tanatex Chemicals, Netherlands      |
|                 | Viscosity at 20°C ≤ 90 s (ISO 2431, flow cup 4 mm)                    |                                     |
|                 | Density: 1.1 g/cm <sup>3</sup>                                        |                                     |
|                 | Ionicity: Anionic                                                     |                                     |
|                 | White                                                                 |                                     |
| Tanapur EP 3061 | Aqueous preparation of an aliphatic polyether polyurethane            | Tanatex Chemicals, Netherlands      |
|                 | Density: 1.0-1.1 g/cm <sup>3</sup>                                    |                                     |
|                 | Ionicity: Slightly cationic                                           |                                     |
|                 | Light Yellow, Yellow clear liquid                                     |                                     |
| Thickener A 02  | Polyurethane preparation                                              | Tanatex Chemicals, Netherlands      |
|                 | Viscosity at 23°C: 5000-10000 mPa.s                                   |                                     |
|                 | Density: 1.19 g/cm <sup>3</sup>                                       |                                     |
|                 | Ionicity: Nonionic                                                    |                                     |
|                 | Yellowish liquid                                                      |                                     |
| GNPs            | Thickness: 3 and 10 nm                                                | Graphenest, Portugal                |
|                 | Planar size: 0.5 to 0.2 µm                                            |                                     |
|                 | Surface Area: 150 m <sup>2</sup> /g                                   |                                     |
| CNTs            | Multi-Walled Carbon Nanotubes                                         | Iolitec Ionic Technologies, Germany |
|                 | Length: ~1.5 µm                                                       |                                     |
|                 | 90% C Purity Industrial Grade                                         |                                     |
| Cotton Fabric   | Weft density = 26/cm <sup>2</sup> , Warp density = 33/cm <sup>2</sup> | Lameirinho, Portugal                |
|                 | GSM= 119.68 g/m <sup>2</sup>                                          |                                     |

Table S2. Electrical resistivity of various samples coated with GNPs

| GNPs % (w/v) | Electrical Resistivity ( $\Omega\text{m}$ ) |                                       |                                       |
|--------------|---------------------------------------------|---------------------------------------|---------------------------------------|
|              | 1 Layer                                     | 2 Layers                              | 3 Layers                              |
| 0            | $8.80\text{E}+07 \pm 0.00\text{E}+00$       | $8.80\text{E}+07 \pm 0.00\text{E}+00$ | $8.80\text{E}+07 \pm 0.00\text{E}+00$ |
| 2            | $2.24\text{E}+05 \pm 9.80\text{E}+03$       | $2.40\text{E}+05 \pm 0.00\text{E}+00$ | $2.40\text{E}+05 \pm 0.00\text{E}+00$ |
| 3            | $1.12\text{E}+03 \pm 1.50\text{E}+02$       | $1.40\text{E}+04 \pm 0.00\text{E}+00$ | $8.00\text{E}+04 \pm 0.00\text{E}+00$ |
| 5            | $3.11\text{E}+00 \pm 1.85\text{E}-02$       | $3.94\text{E}+00 \pm 1.39\text{E}-01$ | $4.97\text{E}+00 \pm 2.18\text{E}-01$ |
| 7            | $9.62\text{E}-01 \pm 8.21\text{E}-02$       | $1.06\text{E}+00 \pm 4.64\text{E}-02$ | $2.04\text{E}+00 \pm 2.36\text{E}-01$ |
| 10           | $1.45\text{E}-01 \pm 4.39\text{E}-03$       | $1.53\text{E}-01 \pm 7.65\text{E}-03$ | $2.09\text{E}-01 \pm 8.33\text{E}-03$ |
| 12           | $1.07\text{E}-01 \pm 1.09\text{E}-03$       | $1.11\text{E}-01 \pm 1.83\text{E}-03$ | $1.67\text{E}-01 \pm 3.03\text{E}-03$ |

Table S3. Conductivity of various samples coated with GNPs

| GNPs % (w/v) | Electrical Conductivity (S/m)         |                                       |                                       |
|--------------|---------------------------------------|---------------------------------------|---------------------------------------|
|              | 1 Layer                               | 2 Layers                              | 3 Layers                              |
| 0            | $1.14\text{E}-08 \pm 0.00\text{E}+00$ | $1.14\text{E}-08 \pm 0.00\text{E}+00$ | $1.14\text{E}-08 \pm 0.00\text{E}+00$ |
| 2            | $4.56\text{E}-06 \pm 2.04\text{E}-07$ | $4.17\text{E}-06 \pm 0.00\text{E}+00$ | $4.17\text{E}-06 \pm 0.00\text{E}+00$ |
| 3            | $9.58\text{E}-04 \pm 1.25\text{E}-04$ | $7.14\text{E}-05 \pm 0.00\text{E}+00$ | $1.25\text{E}-05 \pm 0.00\text{E}+00$ |
| 5            | $3.22\text{E}-01 \pm 1.91\text{E}-03$ | $2.55\text{E}-01 \pm 9.31\text{E}-03$ | $2.03\text{E}-01 \pm 8.31\text{E}-03$ |
| 7            | $1.06\text{E}+00 \pm 7.16\text{E}-02$ | $9.48\text{E}-01 \pm 3.81\text{E}-02$ | $5.08\text{E}-01 \pm 4.29\text{E}-02$ |
| 10           | $6.92\text{E}+00 \pm 1.99\text{E}-01$ | $6.57\text{E}+00 \pm 2.90\text{E}-01$ | $4.82\text{E}+00 \pm 1.79\text{E}-01$ |
| 12           | $9.39\text{E}+00 \pm 1.28\text{E}-01$ | $9.04\text{E}+00 \pm 1.35\text{E}-01$ | $6.01\text{E}+00 \pm 1.13\text{E}-01$ |

Table S4. Electrical resistivity and conductivity of various samples coated with GNPs + CNTs (50:50)

| GNPs % (w/v) | Electrical Resistivity ( $\Omega\text{m}$ ) | Electrical Conductivity (S/m)         |
|--------------|---------------------------------------------|---------------------------------------|
|              | 1 Layer                                     | 1 Layer                               |
| 0            | $8.80\text{E}+07 \pm 0.00\text{E}+00$       | $1.14\text{E}-08 \pm 0.00\text{E}+00$ |
| 3            | $4.23\text{E}-01 \pm 4.02\text{E}-03$       | $2.37\text{E}+00 \pm 2.05\text{E}-02$ |
| 5            | $1.11\text{E}-01 \pm 9.46\text{E}-04$       | $9.02\text{E}+00 \pm 6.62\text{E}-02$ |
| 7            | $2.11\text{E}-01 \pm 1.12\text{E}-03$       | $4.73\text{E}+00 \pm 3.07\text{E}-02$ |
| 10           | $3.96\text{E}-01 \pm 6.80\text{E}-03$       | $2.52\text{E}+00 \pm 5.00\text{E}-02$ |
